# Supplementary material for: Complex Mutations & Subpopulations of Deletions at Exon 19 of EGFR in NSCLC Revealed by Next Generation Sequencing: Potential Clinical Implications
Source: PLoS One. 2012 Jul 27;7(7):e42164. doi: 10.1371/journal.pone.0042164 (PMC3407088; doi:10.1371/journal.pone.0042164)
Supplement: Table S2 — EGFR mutations observed by next generation sequencing in the whole series of tumors investigated. (XLS) [file pone.0042164.s003.xls]

## Sheet: Table S2
	Table S2. EGFR mutations observed by next generation sequencing in the whole series of tumors investigated
	Cases carrying subpopulations in less than 0.1% of the DNA molecules are labeled with an asterisk (*).
	Case number	Number of sequences per case	Mutation/s		Genomic change	Percentage of mutation
	# 1	11639		c.2240_2254del	15 bp_del	42.3%
	# 2	7493		c.2236_2250del	15 bp_del	34.19%
	# 3	2373	Main	c.2235_2249del	15 bp_del	49.77%
			Subpopulation 1*	c.2234_2245del c.2248_2249del	12 bp_del/2 bp_del	0.08%
	# 4	2130	Main	c.2235_2249del	15 bp_del	57.79%
			Subpopulation 1*	c.2232insC c.2235_2249del	1 bp_ins/15 bp_del	0.09%
	# 5	5130	Main	c.2235_2249del	15 bp_del	53.4%
			Subpopulation 1*	c.2235_2245del c.2248del c.2252_2253del	11 bp_del/1 bp_del/2 bp_del	0.03%
	# 6	2179		c.2235_2249del	15 bp_del	0.5695
	# 7	2624	Main	c.2235_2249del	15 bp_del	57.96%
			Subpopulation 1*	c.2231del c.2233A>C c.2235G>A c.2236_2249del	1 bp_del/14 bp_del	0.07%
	# 8	3626	Main	c.2236_2250del	15 bp_del	25.01%
			Subpopulation 1	c.2237_2253del c.2255del	17 bp_del/1 bp_del	0.13%
			Subpopulation 2*	c.2240_2257del	18 bp_del	0.08%
			Subpopulation 3*	c.2237_2254del	18 bp_del	0.05%
	# 9	4068		c.2240_2254del	15 bp_del	85.82%
	# 10	2567	Main	c.2238_2249del c.2252_2253C>AT	12 bp_del	0.13
			Subpopulation 1	c.2239_2251del c.2252_2253C>AT	13 bp_del	0.85%
	# 11	3738	Main	c.2235_2249del	15 bp_del	59.66%
			Subpopulation 1	c.2232insA c.2235_2249del	1 bp_ins/15 bp_del	0.13%
	# 12	3331		c.2237_2253del c.2255del	17 bp_del/1 bp_del	19.42%
	# 13	4070	Main	c.2235_2249del	15 bp_del	45.26%
			Subpopulation 1*	c.2234_2245del c.2248_2249del	12 bp_del/2 bp_del	0.07%
	# 14	4276	Main	c.2237_2253del c.2258del	17 bp_del/1 bp_del	44.46%
			Subpopulation 1*	c.2240_2257del	18 bp_del	0.09%
	# 15	4394	Main	c.2235_2249del	15 bp_del	40.21%
			Subpopulation 1*	c.2237_2253del c.2255del	17 bp_del/1 bp_del	0.04%
			Subpopulation 2*	c.2232insA c.2235_2249del	1 bp_ins/15 bp_del	0.04%
	# 16	5818	Main	c.2237_2253del c.2255del	17 bp_del/1 bp_del	68.04%
			Subpopulation 1*	c.2237_2238del c.2241_2255del	2 bp_del/15 bp_del	0.07%
	# 17	2856	Main	c.2235_2249del	15 bp_del	38.17%
			Subpopulation 1*	c.2237_2253del c.2255del	17 bp_del/1 bp_del	0.07%
			Subpopulation 2*	c.2240_2254del	15 bp_del	0.07%
			Subpopulation 3*	c.2234_2245del c.2252_2253del	12 bp_del/3 bp_del	0.07%
	# 18	5154		c.2239_2248delinsC	10 bp_del/1 bp_ins	21.75%
	# 19	3253	Main	c.2235_2249del	15 bp_del	40.52%
			Subpopulation 1	c.2234_2245del c.2248_2249del	12 bp_del/2 bp_del	0.12%
			Subpopulation 2*	c.2232insA c.2235_2249del	1 bp_ins/15 bp_del	0.06%
	# 20	11248	Main	c.2240_2254del	15 bp_del	25.39%
			Subpopulation 1	c.2236_2250del	15 bp_del	0.1%
			Subpopulation 2*	c.2240_2251del c.2253del c.2257_2258del	12 bp_del/1 bp_del/2 bp_del	0.03%
	# 21	5360		c.2236_2250del	15 bp_del	19.89%
	# 22	4259	Main	c.2236_2252del c.2258del	17 bp_del/1 bp_del	64.48%
			Subpopulation 1*	c.2236_2237del c.2239_2252del c.2258delC	2 bp_del/14 bp_del/1 bp_del	0.04%
	# 23	4261	Main	c.2235_2249del	15 bp_del	49.12%
			Subpopulation 1*	c.2235_2245del c.2248del c.2252_2253del	11 bp_del/1 bp_del/2 bp_del	0.09%
			Subpopulation 2*	c.2232insA c.2235_2249del	1 bp_ins/15 bp_del	0.07%
	# 24	3794	Main	c.2237_2253del c.2255del	17 bp_del/1 bp_del	19.87%
			Subpopulation 1	c.2240_2254del	15 bp_del	0.71%
	# 25	3063		c.2237_2253del c.2256del	17 bp_del/1 bp	55.4%
	# 26	2757		c.2235_2249del	15 bp_del	47.01%
	# 27	4389	Main	c.2240T>C c.2246_2260del	15 bp_del	72.7%
			Subpopulation 1	c.2237_2253del c.2255del	17 bp_del/1 bp_del	0.11%
			Subpopulation 2*	c.2240_2254del	15 bp_del	0.09%
			Subpopulation 3*	c.2240T>C c.2251_2254del c.2256_2266del	4 bp_del/11 bp_del	0.06%
			Subpopulation 4*	c.2240T>C c.2249_2256del c.2260_2266del	8 bp_del/7 bp_del	0.04%
			Subpopulation 5*	c.2240T>C c.2249del c.2251_2264del	1 bp_del/14 bp_del	0.04%
	# 28	3020	Main	c.2235_2249del	15 bp_del	27.32%
			Subpopulation 1	c.2237_2253del c.2255del	17 bp_del/1 bp_del	0.26%
	# 29	3257	Main	c.2236_2250del	15 bp_del	92.91%
			Subpopulation 1	c.2240_2254del	15 bp_del	0.12%
	# 30	2426	Main	c.2235_2249del	15 bp_del	59.85%
			Subpopulation 1*	c.2234_2249del c.2253insG	16 bp_del/1 bp_ins	0.08%
	# 31	6402		c.2236_2250del	15 bp_del	20.96%
	# 32	142		c.2235_2249del	15 bp_del	51.41%
	# 33	3209	Main	c.2236_2250del	15 bp_del	64.16%
			Subpopulation 1*	c.2237_2253del c.2255del	17 bp_del/1 bp_del	0.06%
	# 34	3237	Main	c.2240_2254del c.2260A>G	15 bp_del	41.92%
			Subpopulation 1*	c.2240_2254del	15 bp_del	0.95%
	# 35	2746		c.2236_2250del	15 bp_del	15.4%
	# 36	6368	Main	c.2235_2249del	15 bp_del	34.97%
			Subpopulation 1*	c.2234_2245del c.2248_2249del	12 bp_del/2 bp_del	0.03%
	# 37	1863	Main	c.2235_2249del	15 bp_del	54.75%
			Subpopulation 1	c.2234_2245del c.2251_2252del	12 bp_del/2 bp_del	0.16%
			Subpopulation 2	c.2234_2249del c.2253insG	16 bp_del/1 bp_ins	0.1%
			Subpopulation 3	c.2237_2249del c.2254del	13 bp_del/1 bp_del	0.1%
	# 38	4776	Main	c.2237_2253del c.2255del	17 bp_del/1 bp_del	54.04%
			Subpopulation 1	c.2239_2248del c.2250_2251del	10 bp_del/2 bp_del	2.74%
			Subpopulation 2	c.2237_2238del c.2241_2255del	2 bp_del/15 bp_del	0.18%
	# 39	1747	Main	c.2237_2253del c.2255del	17 bp_del/1 bp_del	49.6%
			Subpopulation 1	c.2240_2254del	15 bp_del	0.4%
	# 40	1751	Main	c.2236_2250del	15 bp_del	9.04%
			Subpopulation 1	c.2237_2253del c.2255del	17 bp_del/1 bp_del	0.45%
	# 41	2229	Main	c.2240_2257del	18 bp_del	42.44%
			Subpopulation 1	c.2240_2254del	15 bp_del	0.4%
			Subpopulation 2*	c.2235_2249del	15 bp_del	0.09%
	# 42	2887	Main	c.2240_2257del	18 bp_del	35.5%
			Subpopulation 1	c.2235_2249del	15 bp_del	0.9%
			Subpopulation 2	c.2237_2253del c.2255del	17 bp_del/1 bp_del	0.1%
	# 43	2737		c.2235_2249del	15 bp_del	58.24%
	# 44	3039	Main	c.2237_2253del c.2255del	17 bp_del/1 bp_del	62.69%
			Subpopulation 1*	c.2235_2249del	15 bp_del	0.06%
	# 45	2977	Main	c.2235_2249del	15 bp_del	32.58%
			Subpopulation 1	c.2240_2257del	18 bp_del	0.3%
	# 46	2368	Main	c.2240_2257del	18 bp_del	33.66%
			Subpopulation 1	c.2237_2253del c.2258del	17 bp_del/1 bp_del	0.12%
			Subpopulation 2*	c.2236_2250del	15 bp_del	0.08%
	# 47	5629	Main	c.2237_2253del c.2255del	17 bp_del/1 bp_del	32.92%
			Subpopulation 1	c.2240_2257del	18 bp_del	17.07%
	# 48	5085	Main	c.2235_2249del	15 bp_del	5.17%
			Subpopulation 1	c.2237_2253del c.2255del	17 bp_del/1 bp_del	0.29%
			Subpopulation 2	c.2235_2236del c.2240_2252del c.2260A>G c.2262A>G	2 bp_del/13 bp_del	0.13%
	# 49	2172	Main	c.2236_2250del	15 bp_del	39.64%
			Subpopulation 1*	c.2232_2233CA>AC c.2235G>A c.2236del c.2241A>C c.2242_2248del	1 bp_del/7 bp_del	0.09%
			Subpopulation 2*	c.2237_2251del	15 bp_del	0.09%
			Subpopulation 3*	c.2239_2248del c.2250_2251del	10 bp_del/2 bp_del	0.09%
			Subpopulation 4*	c.2240_2254del	15 bp_del	0.09%
	# 50	6091	Main	c.2235_2249del	15 bp_del	36.41%
			Subpopulation 1*	c.2235_2249del c.2253insT	15 bp_del/1 bp_ins	0.05%
	# 51	4988		c.2237_2253del c.2255del	17 bp_del/1 bp_del	15.15%
	# 52	2552		c.2240_2254del	15 bp_del	51.69%
	# 53	6484	Main	c.2239_2248del c.2253_2260del	10 bp_del/8 bp_del	0.2587
			Subpopulation 1	c.2235_2249del	15 bp_del	0.0491
			Subpopulation 2	c.2239_2248del c.2250_2251del	10 bp_del/2 bp_del	0.66%
			Subpopulation 3	c.2235_2236del c.2241 A>C c.2242_2248del	2 bp_del/7 bp_del	0.13%
			Subpopulation 4*	c.2237_2239del c.2243_2248del c.2253_2260del	3 bp_del/6 bp_del/8 bp_del	0.03%
	# 54	2725	Main	c.2236_2250del	15 bp_del	27.34%
			Subpopulation 1	c.2240_2254del	15 bp_del	0.47%
	# 55	3820		c.2235_2249del	15 bp_del	41.67%
	# 56	4521		c.2236_2250del	15 bp_del	26.61%
	# 57	2873	Main	c.2235_2249del	15 bp_del	50.23%
			Subpopulation 1	c.2237_2253del c.2255del	17 bp_del/1 bp	0.97%
			Subpopulation 2	c.2228C>G c.2237_2251del	15 bp_del	0.87%
			Subpopulation 3*	c.2234_2245del c.2248_2249del	12 bp_del/2 bp_del	0.07%
			Subpopulation 4*	c.2234_2245del c.2251_2253del	12 bp_del/3 bp_del	0.07%
	# 58	4308	Main	c.2235_2249del	15 bp_del	64.11%
			Subpopulation 1	c.2230_2237del c.2245_2251del	8 bp_del/7 bp_del	0.76%
			Subpopulation 2*	c.2234_2245del c.2248_2249del	12 bp_del/2 bp_del	0.04%
	# 59	5835	Main	c.2230_2237del c.2245_2251del	8 bp_del/7 bp_del	30.85%
			Subpopulation 1	c.2254_2277del	24 bp_del	2.38%
			Subpopulation 2	c.2230_2237del c.2245_2250del	8 bp_del/6 bp_del	0.17%
			Subpopulation 3*	c.2230_2237del c.2241del c.2245_2250del	8 bp_del/1 bp_del/6 bp_del	0.06%
			Subpopulation 4*	c.2230_2237del c.2245_2248del c.2252_2253del	8 bp_del/4 bp_del/2 bp_del	0.03%
	# 60	2974		c.2236_2250del	15 bp_del	38.03%
	# 61	2725	Main	c.2239_2262del c.2263_2274dup(ins)	24 bp_del/12 bp_ins	40.51%
			Subpopulation 1	c.2240_2254del	15 bp_del	0.29%
	# 62	2655		c.2235_2249del	15 bp_del	22.17%
	# 63	2240		c.2235_2249del	15 bp_del	44.15%
	# 64	5781	Main	c.2234_2236del c.2241_2252del	3 bp_del/12 bp_del	24.79%
			Subpopulation 1*	c.2235_2249del	15 bp_del	0.08%
			Subpopulation 2*	c.2235_2238del c.2241_2252del	4 bp_del/12 bp_del	0.03%
	# 65	2832	Main	c.2235_2249del	15 bp_del	59.75%
			Subpopulation 1	c.2240_2257del	18 bp_del	0.91%
			Subpopulation 2	c.2236_2252del c.2258del	17 bp_del/1 bp_del	0.81%
	# 66	1492		c.2236_2250del	15 bp_del	28.95%
	# 67	4725		c.2237_2253del c.2258del	17 bp_del/1 bp_del	33.22%
	# 68	1328		c.2235_2249del	15 bp_del	75.15%
	# 69	2938	Main	c.2235_2249del	15 bp_del	52.48%
			Subpopulation 1	c.2240_2254del	15 bp_del	0.27%
	# 70	1436		c.2236_2250del	15 bp_del	40.38%
	# 71	2198		c.2235_2249del	15 bp_del	30.8%
	# 72	3793		c.2235_2249del	15 bp_del	36.47%
	# 73	2871	Main	c.2237_2253del c.2255del	17 bp_del/1 bp_del	43.26%
			Subpopulation 1	c.2237_2238del c.2241_2255del	2 bp_del/15 bp_del	0.1%
			Subpopulation 2*	c.2235_2249del	15 bp_del	0.07%
	# 74	2570	Main	c.2237_2253del c.2255del	17 bp_del/1 bp_del	35.83%
			Subpopulation 1	c.2235_2249del	15 bp_del	0.27%
			Subpopulation 2	c.2237_2238del c.2241_2255del	2 bp_del/15 bp_del	0.11%
	# 75	3353		c.2239_2248delinsC	10 bp_del/1 bp_ins	52.55%
	# 76	3787	Main	2235_2249del	15 bp_del	59.92%
			Subpopulation 1	c.2234_2245del c.2248_2249del	12 bp_del/2 bp_del	0.31%
	# 77	3526	Main	c.2240_2257del	18 bp_del	10.81%
			Subpopulation 1	c.2240_2254del	15 bp_del	0.34%
			Subpopulation 2	c.2228C>T c.2237_2251del	15 bp_del	0.34%
			Subpopulation 3*	c.2237_2253del c.2255del	17 bp_del/1 bp_del	0.05%
	# 78	1959	Main	c.2236_2250del	15 bp_del	32.51%
			Subpopulation 1	c.2234_2249del	16 bp_del	0.1%
			Subpopulation 2	c.2237_2253del c.2255del	17 bp_del/1 bp_del	0.1%
	# 79	3454	Main	c.2235_2249del	15 bp_del	84.99%
			Subpopulation 1	c.2234_2245del c.2248_2249del	12 bp_del/2 bp_del	0.28%
			Subpopulation 2*	c.2237_2253del c.2258del	17 bp_del/1 bp_del	0.08%
	# 80	3713	Main	c.2240_2257del	18 bp_del	63.85%
			Subpopulation 1	c.2240_2254del	15 bp_del	0.18%
	# 81	3503	Main	c.2237_2253del c.2255del	17 bp_del/1 bp_del	34.91%
			Subpopulation 1*	c.2237_2238del c.2241_2255del	2 bp_del/15 bp_del	0.05%
	# 82	3821	Main	c.2239_2248delinsC	10 bp_del/1 bp_ins	28.76%
			Subpopulation 1	c.2235_2249del	15 bp_del	0.63%
			Subpopulation 2*	2236_2244del	9 bp_del	0.05%
	# 83	3218	Main	c.2239_2248delinsC	10 bp_del/1 bp_ins	61.72%
			Subpopulation 1*	c.2234_2240del c.2244del c.2248G>C	7 bp_del/1 bp_del	0.06%
			Subpopulation 2*	c.2240_2254del	15 bp_del	0.06%
			Subpopulation 3*	c.2239_2241TTA>CCT c.2242_2249del	8 bp_del	0.06%
	# 84	2641	Main	c.2236_2250del	15 bp_del	55.50%
			Subpopulation 1	c.2234_2240del c.2245_2251del	7 bp_del/7 bp_del	0.18%
			Subpopulation 2	c.2239_2248delinsC	10 bp_del/1 bp_ins	0.18%
			Subpopulation 3	c.2240_2254del	15 bp_del	0.15%
	# 85	3006	Main	c.2235_2249del	15 bp_del	16.63%
			Subpopulation 1	c.2240_2254del	15 bp_del	0.13%
			Subpopulation 2	c.2237_2253del c.2255del	17 bp_del/1 bp_del	0.1%
			Subpopulation 3*	c.2234_2245del c.2248_2249del	12 bp_del/2 bp_del	0.06%
	# 86	3371	Main	c.2236_2250del	15 bp_del	43.29%
			Subpopulation 1	c.2240_2254del	15 bp_del	0.2%
	# 87	2815		c.2240_2257del c.2264C>A	18 bp_del	21.46%
	# 88	2452		c.2240_2257del	18 bp_del	29.53%
	# 89	3855	Main	c.2237_2253del c.2255del	17 bp_del/1 bp	53.74%
			Subpopulation 1	c.2240_2254del	15 bp_del	0.36%
			Subpopulation 2	c.2237_2238del c.2241_2255del	2 bp_del/15 bp_del	0.23%
			Subpopulation 3	c.2240_2257del	18 bp_del	0.13%
	# 90	3426	Main	c.2236_2250del	15 bp_del	49.21%
			Subpopulation 1*	c.2240_2254del	15 bp_del	0.08%
	# 91	1335	Main	c.2235_2249del	15 bp_del	71.72%
			Subpopulation 1	c.2232insA c.2235_2249del	1 bp_ins/15 bp_del	0.9%
	# 92	904	Main	c.2239_2256del	18 bp_del	54.42%
			Subpopulation 1	c.2239_2252del c.2254_2256del	14 bp_del/3 bp_del	0.77%
	# 93	2003	Main	c.2236_2250del	15 bp_del	20.37%
			Subpopulation 1	c.2240_2254del	15 bp_del	0.2%
	# 94	2523		c.2236_2250del	15 bp_del	12.01%
	# 95	3019		c.2235_2236del c.2241_2248del c.2250_2251del	2 bp_del/8 bp_del/2 bp_del	22.66%
	# 96	2617	Main	c.2240_2257del	18 bp_del	0.4196
			Subpopulation 1	c.2236_2250del	15 bp_del	0.18%
			Subpopulation 2*	c.2239_2248del c.2253_2260del	10 bp_del/8 bp_del	0.07%
	# 97	1080		c.2236_2250del	15 bp_del	34.81%
	# 98	2214	Main	c.2235_2249del	15 bp_del	62.74%
			Subpopulation 1	c.2232insA c.2235_2249del	1 bp_ins/15 bp_del	0.85%
	# 99	3666	Main	c.2235_2249del	15 bp_del	18.55%
			Subpopulation 1	c.2240_2254del	15 bp_del	0.57%
	# 100	4190		c.2240_2257del c.2264C>G	18 bp_del	40.41%
	# 101	3604	Main	c.2235_2249del	15 bp_del	32.63%
			Subpopulation 1	c.2240_2257del	18 bp_del	0.41%
			Subpopulation 2*	c.2240_2254del	15 bp_del	0.05%
			Subpopulation 3*	c.2235_2236del c.2240_2252del	2 bp_del/13 bp_del	0.05%
	# 102	2061	Main	c.2240_2254del	15 bp_del	16.5%
			Subpopulation 1	c.2235_2249del	15 bp_del	0.24%
			Subpopulation 2	c.2240_2257del c.2264C>G	18 bp_del	0.14%
	# 103	683		c.2235_2249del	15 bp_del	49.19%
	# 104	4817	Main	c.2236_2250del	15 bp_del	38.77%
			Subpopulation 1	c.2240_2254del	15 bp_del	0.77%
	# 105	2764		c.2235_2249del	15 bp_del	53.25%
	# 106	2769	Main	c.2235_2249del c.2253A>T	15 bp_del	53.77%
			Subpopulation 1	c.2234_2245del c.2248_2249del c.2253A>T	12 bp_del/2 bp_del	0.1%
